# Supplementary material for: Facile fabrication of CuCo2S4 nanoparticles/MXene composite as anode for high-performance asymmetric supercapacitor
Source: Royal Society of Chemistry journal article supplement (doi:10.1039/d1qm01029h), 2021-01-01
Supplement: d1qm01029h1.pdf [file d1qm01029h1.pdf]

## Supporting Information

### **Facile fabrication of $\text{CuCo}_2\text{S}_4$ nanoparticles/MXene composite as anode for high-performance asymmetric supercapacitor**

Xiaobo Chen <sup>a\*</sup>, Zimin Ding<sup>a</sup>, Huan Yu<sup>a</sup>, Huiran Ge<sup>a</sup>, Weiwei Liu<sup>a</sup>, Shixin Sun<sup>b\*</sup>

<sup>a</sup> School of Physics and Electronic Engineering, Yancheng Teachers University, Yancheng, 224051, PR China.

E-mail: chenxbok@126.com

<sup>b</sup> College of Chemical and Environmental Engineering, Yancheng Teachers University, Yancheng 224002, PR China.

E-mail: asunshixin@163.com

### **Experimental details**

#### **Structural characterizations**

The X-ray diffraction (XRD) patterns recorded using a SHIMADZU XRD-6100 instrument with  $\text{Cu-K}\alpha$  radiation. The X-ray photoelectron spectra (XPS) were collected by a Thermo ESCALAB 250 electron spectrometer with an X-ray source of Al  $\text{K}\alpha$ . The scanning electron microscopy (SEM) imaging was conducted by Zeiss Supra 35VP scanning electron microscope, and the transmission electron microscopy (TEM) and high-resolution TEM (HRTEM) imaging was conducted by JEOL-2010 transmission electron microscope with 200 kV accelerated voltage. The specific surface area (BET method) of the samples were determined by nitrogen ( $\text{N}_2$ ) adsorption/desorption using an ASAP 2020 V3.01 G instrument.

#### **Electrochemical measurements**

In this experiment, an active material ( $\text{Ti}_3\text{C}_2$  MXene,  $\text{CuCo}_2\text{S}_4$ , MXene/ $\text{CuCo}_2\text{S}_4$ ), polytetrafluoroethylene (PTFE) and acetylene black with mass ratio of 8: 1: 1 were directly loaded on Ni foam and used as a working electrode. The loading mass of the active materials was weighted to be approximately  $3.5 \text{ mg cm}^{-2}$ . All electrochemical tests were carried out on a CHI660E electrochemical workstation

with the Ni foam carrying active material as the working electrode, Pt wire as the counter electrode was, and AgCl/Ag as the reference electrode. Besides, the electrolysis was 6 M KOH aqueous solution (50 mL). The galvanostatic charge/discharge (GCD) test and cycling test were conducted using a LAND battery program-control test system (CT2001A).

### **Fabrication of asymmetric supercapacitor device**

The asymmetric supercapacitor (ASC) was fabricated by using  $\text{Ti}_3\text{C}_2$  MXene/ $\text{CuCo}_2\text{S}_4$  nanohybrid as the positive electrode, an activated carbon as the negative electrode and the electrospun PVdF membrane containing 6 M KOH as the separator as well as electrolyte. Based on the charge balance equation ( $q^+=q^-$ ), the optimal mass ratio of both electrodes is found to be 0.7. Hence, the mass loading of  $\text{Ti}_3\text{C}_2$  MXene/ $\text{CuCo}_2\text{S}_4$  and activated carbon is about 3.5 and 5  $\text{mg cm}^{-2}$ , respectively. The cyclic voltammetry and galvanostatic charge-discharge studies were performed for  $\text{Ti}_3\text{C}_2$  MXene/ $\text{CuCo}_2\text{S}_4$ //AC based ASC and the specific capacitance, energy and power densities were calculated based on the mass of cathode and anode materials.

The specific capacity  $C_s$  ( $\text{C g}^{-1}$ ) of  $\text{CuCo}_2\text{S}_4$ , MXene and MXene/ $\text{CuCo}_2\text{S}_4$  electrodes is obtained from Equation (S1).<sup>[1]</sup>

$$C_s = I\Delta t/m \quad (\text{S1})$$

where  $\Delta t$  (s) is the discharge time,  $I$  (A) is the applied current,  $m$  (g) is the loading mass of active material.

The specific capacity  $C_{\text{device}}$  ( $\text{C g}^{-1}$ ), specific energy  $E$  ( $\text{Wh kg}^{-1}$ ) and specific power  $P$  ( $\text{W kg}^{-1}$ ) of asymmetric supercapacitors can be calculated from the Equation (S2-S4), respectively. <sup>[1-3]</sup>

$$C_{\text{device}} = I\Delta t/m \quad (\text{S2})$$

$$E = \frac{\int_{t1}^{t2} IV_{(t)} dt}{m \times 3.6} \quad (\text{S3})$$

$$P = 3600E/\Delta t \quad (\text{S4})$$

where  $I$  (A) corresponds to the applied current,  $\Delta t$  (s) means the discharging time,  $m$

(g) represents the total loading mass of active materials on both cathode and anode,  $t_1$  (s) is the initial time after IR drop,  $t_2$  (s) is the final time of discharge, and  $\int V(t)dt$  is the integrated area of discharge curves after IR drop.

The discharge profile is governed by the voltage polynomial expressed as:

$$V = V_0 - mt^{0.5} \quad (S5)$$

where  $m$  is a diffusion parameter and is related to  $V_0$ , the initial applied maximum voltage and  $t$  is the time duration of the self-discharge process.

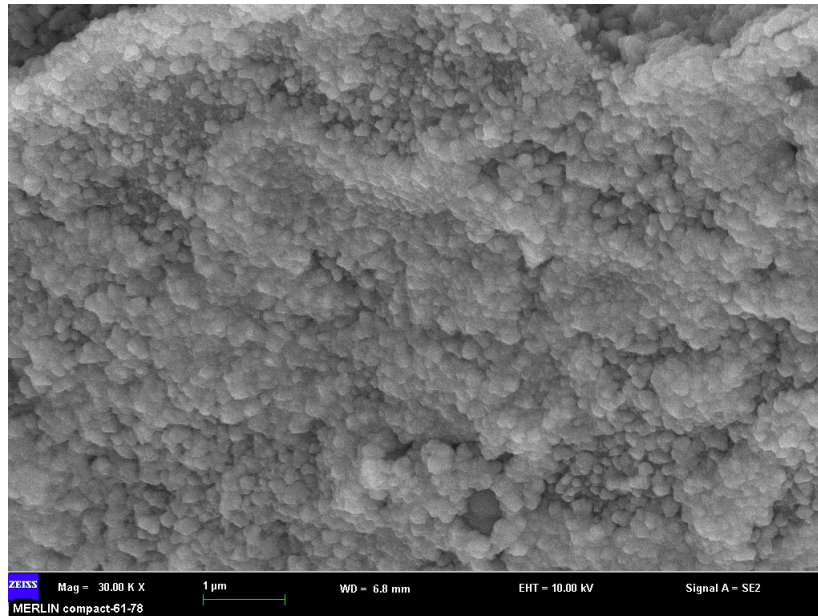

**Fig. S1.** SEM image for the single-phase  $\text{CuCo}_2\text{S}_4$  nanoparticles.

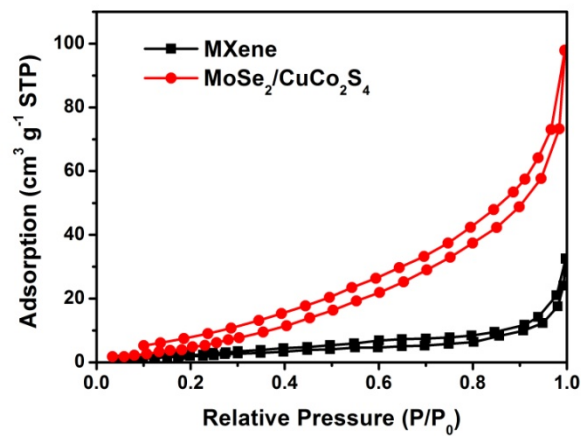

**Fig. S2.** The nitrogen adsorption-desorption isotherms of MXene and MXene/CuCo<sub>2</sub>S<sub>4</sub>.

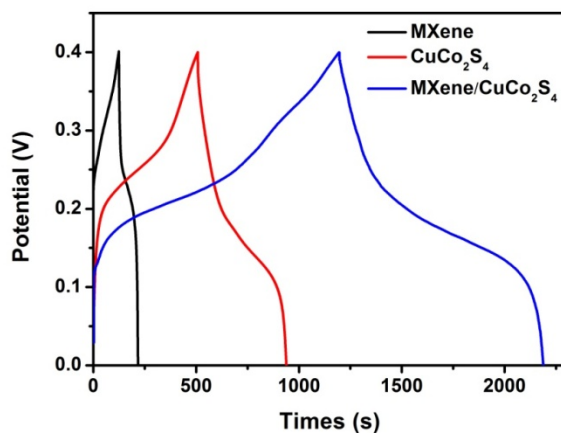

**Fig. S3.** Galvanostatic charge-discharge curves of MXene, CuCo<sub>2</sub>S<sub>4</sub> and MXene/CuCo<sub>2</sub>S<sub>4</sub> at a current density of 1 A g<sup>-1</sup>.

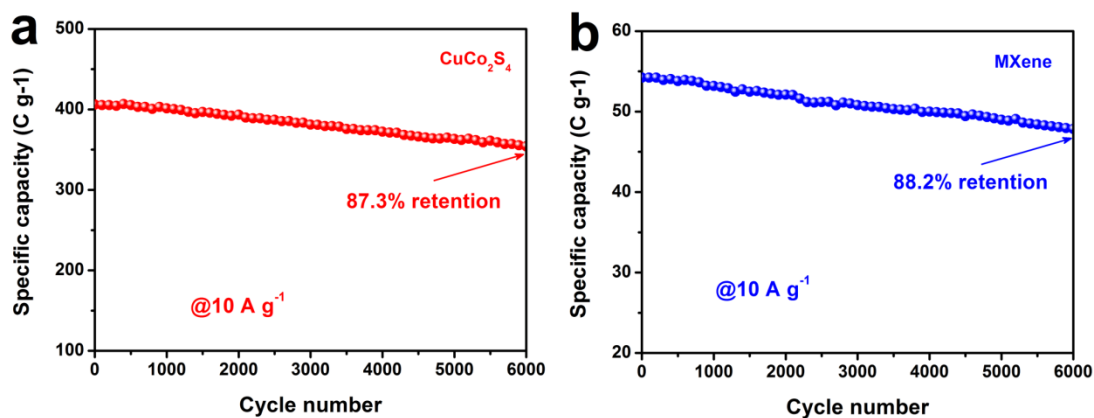

**Fig. S4.** Cycling performance of CuCo<sub>2</sub>S<sub>4</sub> electrode (a) and MXene electrode (b) at 10 A g<sup>-1</sup>.

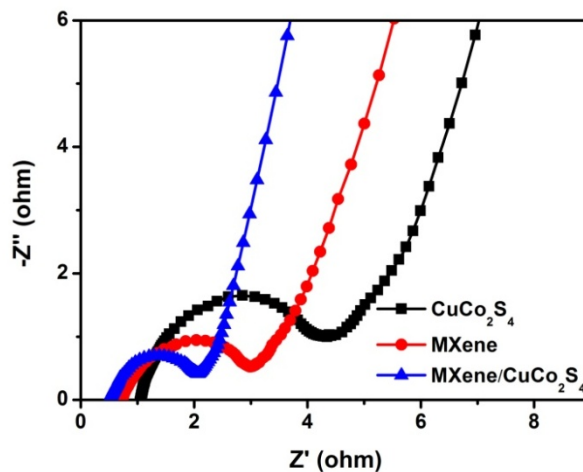

**Fig. S5.** The expanded high frequency region in fig. 4f.

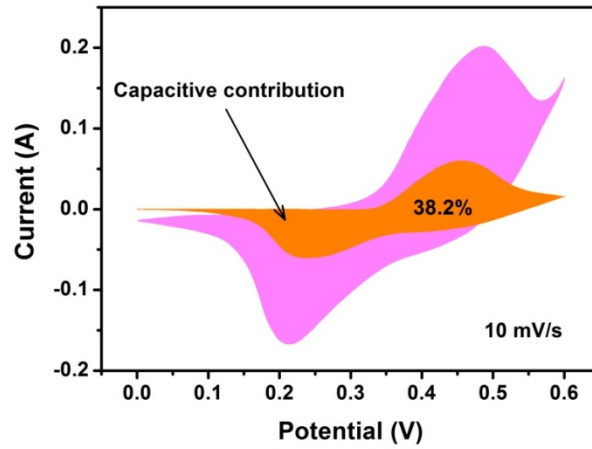

**Fig. S6.** Capacitance-dominated and diffusion-controlled contribution to charge storage of MXene/CuCo<sub>2</sub>S<sub>4</sub> at a scan of 10 mV s<sup>-1</sup>.

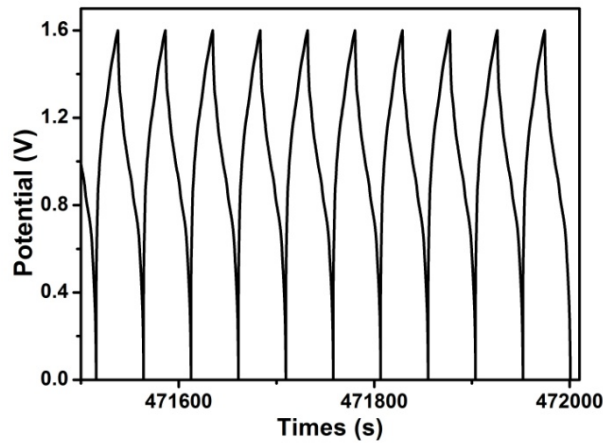

**Fig. S7.** The last 10 circles GCD curves of the hybrid supercapacitor device.

**Table S1.** Comparison of electrochemical performance of MXene/CuCo<sub>2</sub>S<sub>4</sub> electrode with previous reports.

| Materials                                                               | Electrolyte | Specific capacitance<br>(C g <sup>-1</sup> ) | Cycling performance                              | Ref. |
|-------------------------------------------------------------------------|-------------|----------------------------------------------|--------------------------------------------------|------|
| Co(OH) <sub>2</sub> /Ni <sub>2</sub> Mn <sub>1</sub> O <sub>x</sub> /NF | 2 M KOH     | 949.02 at 1 A g <sup>-1</sup>                | 83% after 5000 cycles at 10 A g <sup>-1</sup>    | [4]  |
| CoNiFe LDH                                                              | 1 M KOH     | 360 at 0.4 A g <sup>-1</sup>                 | 81.4% after 2000 cycles at 10 A g <sup>-1</sup>  | [5]  |
| CoNi <sub>2</sub> Se <sub>4</sub>                                       | 6 M KOH     | 632.5 at 1 A g <sup>-1</sup>                 | 83.31% after 3000 cycles at 40 A g <sup>-1</sup> | [6]  |
| Ni@NiMoO <sub>4</sub> @Ni <sub>3</sub> S <sub>2</sub>                   | 6 M KOH     | 870 at 0.6 A g <sup>-1</sup>                 | 81.2% after 8000 cycles at 8 A g <sup>-1</sup>   | [7]  |
| Co <sub>3</sub> O <sub>4</sub>                                          | 2 M KOH     | 576.8 at 1 A g <sup>-1</sup>                 | 82% after 5000 cycles at 5 A g <sup>-1</sup>     | [8]  |
| CoNi <sub>2</sub> Se <sub>4</sub>                                       | 6 M KOH     | 602 at 1 A g <sup>-1</sup>                   | 98.3% after 5000 cycles at 40 A g <sup>-1</sup>  | [9]  |

| Materials                                     | Electrolyte | Specific capacitance<br>(C g <sup>-1</sup> ) | Cycling performance                              | Ref.      |
|-----------------------------------------------|-------------|----------------------------------------------|--------------------------------------------------|-----------|
| Co <sub>9</sub> S <sub>8</sub>                | 3 M KOH     | 926 at 1 A g <sup>-1</sup>                   | 86% after 5000 cycles at 20 A g <sup>-1</sup>    | [10]      |
| Fe <sub>3</sub> O <sub>4</sub> nanoaggregates | 3 M KOH     | 868.7 at 2 A g <sup>-1</sup>                 | 88.8% after 3000 cycles at 2 A g <sup>-1</sup>   | [11]      |
| MnCoP                                         | 3 M KOH     | 879 at 2 A g <sup>-1</sup>                   | 94.4% after 6000 cycles at 6 mA cm <sup>-2</sup> | [12]      |
| (Ni,Mo)S <sub>2</sub> /G                      | 2 M KOH     | 951 at 1 A g <sup>-1</sup>                   | —                                                | [13]      |
| MXene/CuCo <sub>2</sub> S <sub>4</sub>        | 6 M KOH     | 992.3 at 1 A g <sup>-1</sup>                 | 91.2% after 10000 cycles at 10 A g <sup>-1</sup> | This work |

## References

- [1] Wei, G.; Zhao, X.; Du, K.; Huang, Y.; An, C.; Qiu, S.; Liu, M.; Yao, S.; Wu, Y., Flexible asymmetric supercapacitors made of 3D porous hierarchical CuCo<sub>2</sub>O<sub>4</sub>@CQDs and Fe<sub>2</sub>O<sub>3</sub>@CQDs with enhanced performance. *Electrochim. Acta* 2018, 283, 248-259.
- [2] Vadiyar, M. M.; Liu, X.; Ye, Z., Highly porous silver dendrites on carbon nanotube wrapped copper cobaltite nano-flowers for boosting energy density and cycle stability of asymmetric supercapattery. *J. Power Sources* 2019, 415, 154-164.
- [3] Shao, Y.; F., E.-K. M.; Sun, J.; Li, Y.; Zhang, Q.; Zhu, M.; Wang, H.; Dunn, B.; B., K. R., Design and mechanisms of asymmetric supercapacitors. *Chem. Rev.* 2018, 18, 9233-9280.
- [4] H. Xuan, T. Liang, G. Zhang, Y. Guan, H. Li, R. Wang, P. Han, Y. Wu, Synthesis of hierarchical porous Co(OH)<sub>2</sub>/Ni<sub>2</sub>Mn<sub>1</sub>O<sub>x</sub> composites on Ni foam for high performance battery-supercapacitor hybrid devices, *Journal of Alloys and Compounds*, 818 (2020) 153350.
- [5] R. C. Rohit, A. D. Jagadale, S. K. Shinde, D. Y. Kim, V. S. Kumbhar, M. Nakayama, Hierarchical nanosheets of ternary CoNiFe layered double hydroxide for supercapacitors and oxygen evolution reaction, *Journal of Alloys and Compounds*, 863 (2021) 158081.
- [6] J. A. Rajesh, Y. H. Lee, Y. H. Yun, V. H. V. Quy, S. H. Kang, H. Kim, K. S. Ahn, Potentiostatic deposition of CoNi<sub>2</sub>Se<sub>4</sub> nanostructures on nickel foam as efficient battery-type electrodes for supercapacitors, *Journal of Electroanalytical Chemistry*, 850 (2019) 113371.
- [7] L. Feng, P. Yang, W. Ling, S. Wang, J. Shi, F. Wang, 3D hierarchical flower-like NiMoO<sub>4</sub>@Ni<sub>3</sub>S<sub>2</sub> composites on Ni foam for high-performance battery-type supercapacitors, *Journal of Physics and Chemistry of Solids*, 148 (2021) 109697.
- [8] S. Kong, F. Yang, K. Cheng, T. Ouyang, K. Ye, G. Wang, D. Cao, In-situ growth of cobalt oxide nanoflakes from cobalt nanosheet on nickel foam for battery-type supercapacitors with high specific capacity, *Journal of Electroanalytical Chemistry*, 785 (2017) 103-108.
- [9] J. A. Rajesh, Y. H. Lee, Y. H. Yun, V. H. V. Quy, S. H. Kang, H. Kim, K. S. Ahn, Bifunctional NiCo<sub>2</sub>Se<sub>4</sub> and CoNi<sub>2</sub>Se<sub>4</sub> nanostructures: Efficient electrodes for battery-type supercapacitors and electrocatalysts for the oxygen evolution reaction, *Journal of Industrial and Engineering Chemistry*, 79 (2019) 370-382.
- [10] J. Li, Q. Li, J. Sun, Y. Ling, K. Tao, L. Han, Controlled Preparation of Hollow and Porous Co<sub>9</sub>S<sub>8</sub> Microplate Arrays for High-Performance Hybrid Supercapacitors, *Inorganic Chemistry*, 59 (2020) 11174-11183.
- [11] X. Li, Y. Xu, H. Wu, X. Qian, L. Chen, Y. Dan, Q. Yu, Porous Fe<sub>3</sub>O<sub>4</sub>/C nanoaggregates by

the carbon polyhedrons as templates derived from metal organic framework as battery-type materials for supercapacitors, *Electrochimica Acta*, 337 (2020) 135818.

- [12] M. Amiri, S. E. Moosavifard, S. S. H. Davarani, S. K. Kaverlavani, M. Shamsipur, MnCoP hollow nanocubes as novel electrode material for asymmetric supercapacitors, *Chemical Engineering Journal*, 420 (2021) 129910.
- [13] X. Yang, J. Mao, H. Niu, Q. Wang, K. Zhu, K. Ye, G. Wang, D. Cao, J. Yan, NiS<sub>2</sub>/MoS<sub>2</sub> mixed phases with abundant active edge sites induced by sulfidation and graphene introduction towards high-rate supercapacitors, *Chemical Engineering Journal*, 406 (2021) 126713.
